# Supplementary material
Source: MDPI journal article supplement (https://www.mdpi.com/2073-4468/10/3/26)
Supplement: s1 [file s1]

**Supplemental Fig.1. Nucleotide sequences of VH and VL regions of MB5 and MC8 clones.** The sequences encoding CDR1,2 and 3 according to IMGT alignment are underlined. The codons encoding the first 4 amino acids of the constant regions are indicated in bold.

VH MB5:

gaggtgcagctggtgcagtctggagctgaggtgaaaaagccggggagtcctgaagatctcctgtaagggttctggatacaggttagcagctactggat  
cggctgggtgcgcagaagcccggaaggcctggagtggtggatcatctatcctggtagctgataccagatatagtcgtccttccaaggccagg  
tcaccatgtcagtcgacaagtctatcaacaccgcctacctgcagtggagcagcctgaaggcctcgacaccgcatgtattactgtgcgaaaaagggtt  
ttggagtgggtattacaggctacggtatggacgtctggggccaagggaccacggtcaccgtctcctcagcctccaccaag

Vk MB5:

gatattgtgatgactcagtcctcactctccctgcccgtcaccctggagagccggcctccatctcctgcaggtctagttagagcctcctgcatagtaatggat  
acaactatttgattggtacctgcagaagccaggcagtcctcacagctcctgatctattgggttctaatacggcctccgggtccctgacaggttcagtgg  
cagtggtcagggcacagattatactgaaaatcagcagagtgaggctgaggatgttgggtttattactgcatgcaagctctacaaactcctcacacttt  
tggccaggggaccaagctggagatcaaacgaactgtggct

VH MC8

gaggtgcagctgttgagctctgggggaggcttggtacagcctgaggggtcctgagactctcctgtgcagccgctggattcaccttagcagttatgccatg  
acctgggtccgccaggctccagggaagggtgagtggtctcagaaattagtgatagtgctggtaccacattctacgcagcctccgtgaaggccggtt  
caccatctccagagacaattccaagaacactctacatctgcaaatgaacagcctgagagccgaggacacggcctatattactgtgcgaaagcgaccctg  
acccggcgtgagcttgactactggggccagggaaccctggtcaccgtctcctcagcctccaccaag

VK MC8

gaaattgtgtgacacagtcctccagccaccctgtctttgtctccaggggaaagagccaccctctcctgcagggccagttagagtgtagcacctacttagcct  
ggtaccaacagaaacctggccaggctccaggctcctcatctatgatgtattcaagagggccactggcatccagccaggttcagtggtgagtggtctggg  
acagacttactctcaccatcagcagcctagagcctgaagattttgagtttattactgtcagcagcgtagtaactggcctccgtacacttttggccagggga  
ccaagctggagatcaaacgaactgtggct
